# Supplementary material for: Progressive stages of dysmetabolism are associated with impaired biological features of human cardiac stromal cells mediated by the oxidative state and autophagy
Source: PubMed Central journal article supplement — J Pathol. 2022 Jul 28;258(2):136–48. doi: 10.1002/path.5985 (PMC9542980; doi:10.1002/path.5985), 2022-07-28
Supplement: PATH-258-136-s001.pdf [file PATH-258-136-s001.pdf]

**Progressive stages of dysmetabolism are associated with impaired biological features of human cardiac stromal cells mediated by the oxidative state and autophagy**

F Pagano, V Pichio, *et al.* *J Pathol* <https://doi.org/10.1002/path.5985>

**Supplementary Figures S1, S2**

**Supplementary Table S1**

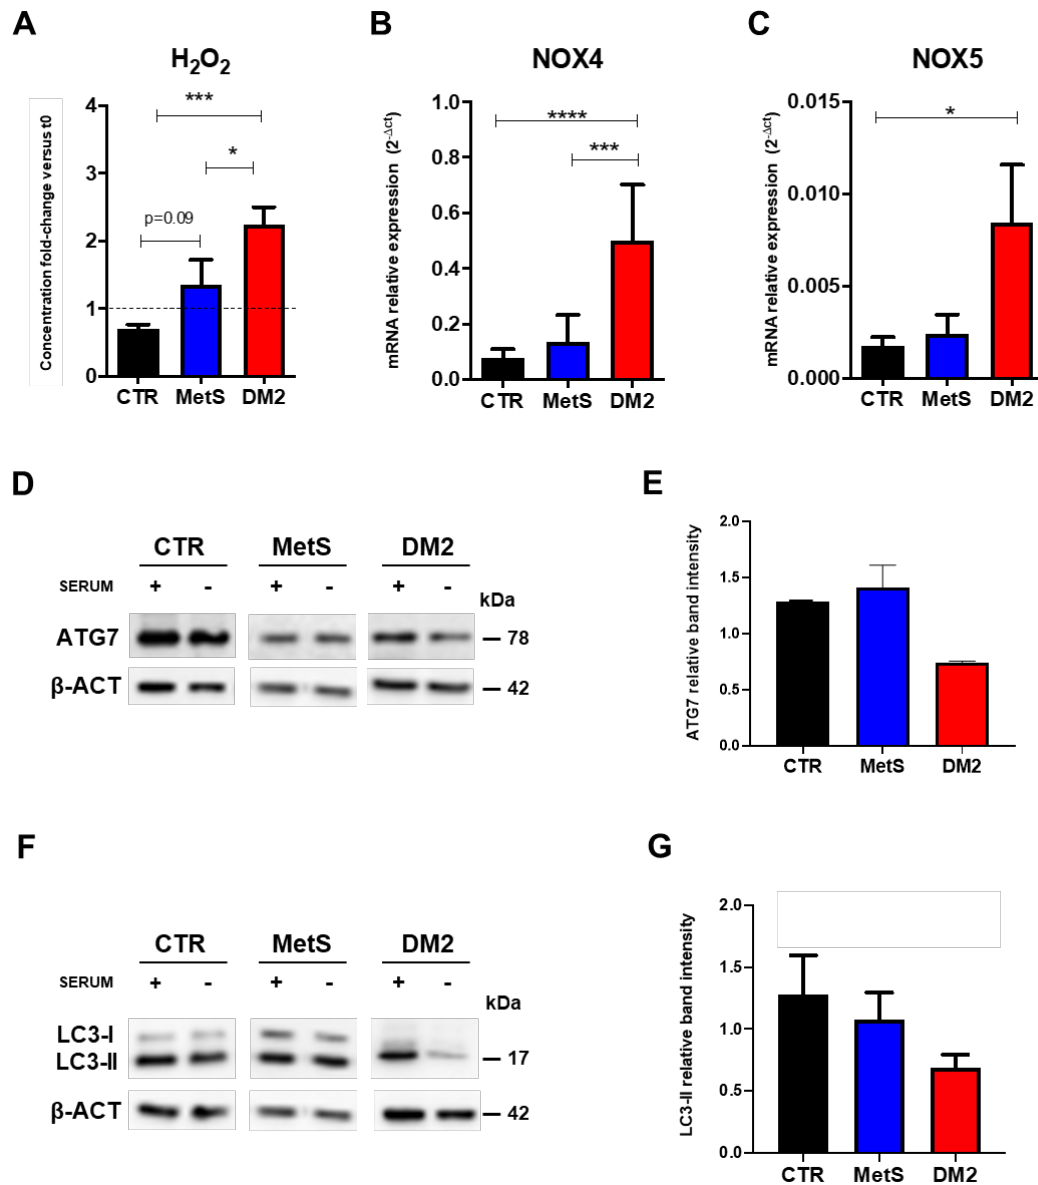

**Figure S1. Oxidative state and autophagy modulation in CSCs after starvation.** (A) Quantification of H<sub>2</sub>O<sub>2</sub> concentration in conditioned media samples of CSCs from the different donor groups. Gene expression analysis by RT-qPCR of *NOX4* (B) and *NOX5* (C) in CSCs from different groups. N>=6 for each group. Representative western blot panels of ATG7 (D) LC3-II (F) protein levels in CSCs from different donor groups, and relative densitometric analysis (E-G) after 4 hours of starvation, normalized to each corresponding non-starved reference. N>=3 for each group. \* P<0.05. \*\*\* P<0.001. \*\*\*\* P<0.0001.

**A**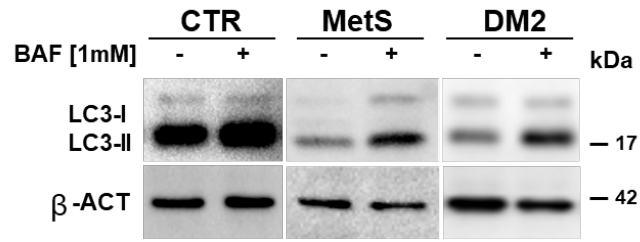**B**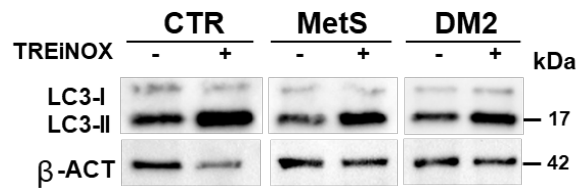**C**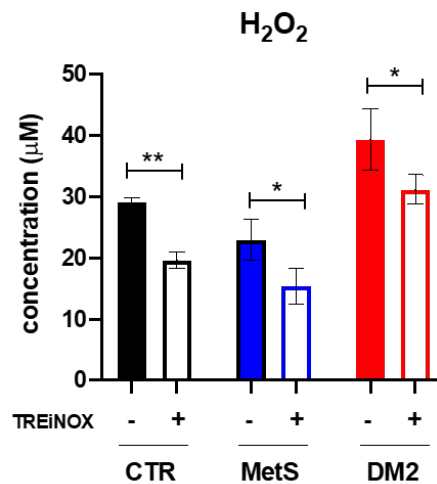

**Figure S2. Validation of autophagy activation and TREiNOX treatment in CSCs.** (A) Representative western blot panels showing LC3-II protein levels at the end of the serum starvation performed adding either DMSO or Bafilomycin A (BAF) to CTR, MetS or DM2-CSC cultures 2 hours before harvesting the cells. (B) Representative western blot panel showing LC3-II and LC3-I, with and without TREiNOX treatment, to test for boosted autophagosome formation rather than reduced lysosome activity. (C) Quantification of hydrogen peroxide release in conditioned media with or without TREiNOX treatment, in CTR, MetS or DM2-CSC cultures to check for the treatment efficacy in reducing oxidative stress. N=3 for each group. \* P<0.05. \*\* P<0.01.

**Table S1.** Sequences of the primers used for RT-qPCR.

| <b>Primer name</b>    | <b>Sequence</b>          |
|-----------------------|--------------------------|
| <i>GATA4</i> Forward  | GTTTTTCCCCTTTGATTTTGGATC |
| <i>GATA4</i> Reverse  | AACGACGGCAACAACGATAAT    |
| <i>ACTA2</i> Forward  | ATGAAGATCCTGACTGAGCG     |
| <i>ACTA2</i> Reverse  | GCAGTGGCCATCTCATTTC      |
| <i>THY1</i> Forward   | CAGCGGAAGACCCAGT         |
| <i>THY1</i> Reverse   | CGTTAGGCTGGTCACCTTCT     |
| <i>NKX2-5</i> Forward | GGTGGAGCTGGAGAAGACAGA    |
| <i>NKX2-5</i> Reverse | CGCCGCTCCAGTTCATAG       |
| <i>POU5F1</i> Forward | GATCAGCCACATCGCCCAG      |
| <i>POU5F1</i> Reverse | TCCCCCTGAGAAAGGAGACC     |
| <i>COL1A1</i> Forward | CACACGTCTCGGTCATGGTA     |
| <i>COL1A1</i> Reverse | AAGAGGAAGGCCAAGTCGAG     |
| <i>COL3A1</i> Forward | CATGCCCTACTGGTCCTCAG     |
| <i>COL3A1</i> Reverse | ATAGCCTGCGAGTCCTCCTA     |
| <i>MMP1</i> Forward   | ACAAGTCCAAATGGGCTTG      |
| <i>MMP1</i> Reverse   | TGTCCTTGGGGTATCCGTGT     |
| <i>NOX4</i> Forward   | AACCAAGGGCCAGAGTATCA     |
| <i>NOX4</i> Reverse   | GGATAAGGCTGCAGTTGAGG     |
| <i>NOX5</i> Forward   | CATCGATGTGTGTGCACGGC     |
| <i>NOX5</i> Reverse   | ATCCGGGTCAATGGAGCCAC     |
| <i>HPRT1</i> Forward  | TCCTCCTCCTGAGCAGTCA      |
| <i>HPRT1</i> Reverse  | ACCCTTTCCAAATCCTCAGC     |
| <i>TNNI3</i> Forward  | GGACAAGGTGGATGAAGAGA     |
| <i>TNNI3</i> Reverse  | AGGGTGGGCCGCTTAAACT      |
| <i>SNAI1</i> Forward  | CTTCTCTAGGCCCTGGCTG      |
| <i>SNAI1</i> Reverse  | CATCTGAGTGGGTCTGGAGG     |
| <i>ADRB2</i> Forward  | AGGCAGCTCCAGAAGATTGA     |
| <i>ADRB2</i> Reverse  | GTCTTGAGGGCTTTGTGCTC     |
| <i>KIT</i> Forward    | GATGGATGGATGGTGGAGAC     |
| <i>KIT</i> Reverse    | GGGATTTTCTCTGCGTTCTG     |

|                       |                         |
|-----------------------|-------------------------|
| <i>CDH5</i> Forward   | CAACGGAACAGAAACATCCC    |
| <i>CDH5</i> Reverse   | CTGCTGCTGCCACTGCT       |
| <i>MYH1</i> Forward   | CAGAAGAAGAAGATGGATGC    |
| <i>MYH1</i> Reverse   | CGCTGGTGTCTGCTCCT       |
| <i>SNAI2</i> Forward  | TCGGACCCACACATTACCTT    |
| <i>SNAI2</i> Reverse  | GCAGTGAGGGCAAGAAAAG     |
| <i>CTNNB1</i> Forward | AGGTCTGAGGAGCAGCTTCA    |
| <i>CTNNB1</i> Reverse | ATTGTCCACGCTGGATTTTC    |
| <i>KDR</i> Forward    | AAAGGGTGGAGGTGACTGAG    |
| <i>KDR</i> Reverse    | CGGTAGAAGCACTTGTAGGC    |
| <i>GJA1</i> Forward   | AGGAGTTCAATCACTTGGCG    |
| <i>GJA1</i> Reverse   | GAGTTTGCCTAAGGCGCTC     |
| <i>CDH2</i> Forward   | GTGCATGAAGGACAGCCTCT    |
| <i>CDH2</i> Reverse   | AGCTTCTCACGGCATAACACC   |
| <i>TGFBR2</i> Forward | AGAAGTCGGAATATAACACCAGC |
| <i>TGFBR2</i> Reverse | TCACACAGGCAGCAGGTTAG    |
| <i>VIM</i> Forward    | ACCCACTCAAAAAGGACACTTC  |
| <i>VIM</i> Reverse    | GGTCATCGTGATGCTGACAA    |
